# Supplementary material
Source: PubMed Central journal article supplement (PMC4260650)
Supplement: NIHMS593122-supplement-Supp_Data.pdf [file NIHMS593122-supplement-Supp_Data.pdf]

## Supplemental Data

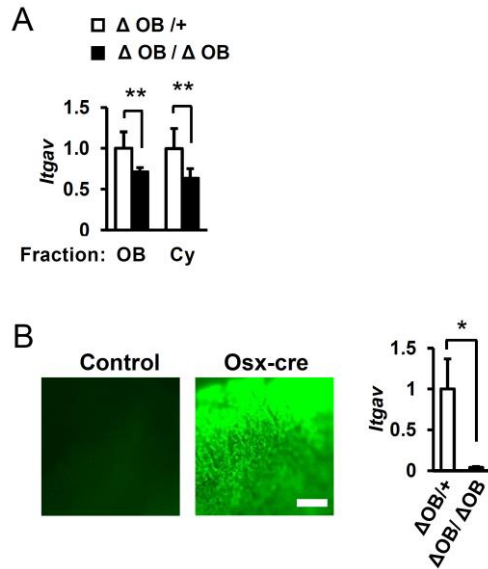

## Supplemental Figure 1

(A) Quantitative RT-PCR analysis of *Itgav* mRNA in osteoblast (OB)- and osteocyte (Cy)-rich fractions isolated from the tibia and femur of  $\Delta OB/+$  and  $\Delta OB/\Delta OB$  mice at 3-mo of age. Data are means  $\pm$  SD for four mice of each group. \*\* $p < 0.01$  (B) Reduced *Itgav* expression in isolated osteoblasts. GFP-positive osteoblastic cells were isolated by FACS from the calvaria of osterix-Cre mice, which express GFP-Cre fusion protein (left panel), and the expression of *Itgav* mRNA was quantified in  $\Delta OB/+$  and  $\Delta OB/\Delta OB$  mice (right panel). \* $p < 0.05$  (n=3 each group). Scale bars, 200 $\mu$ m.

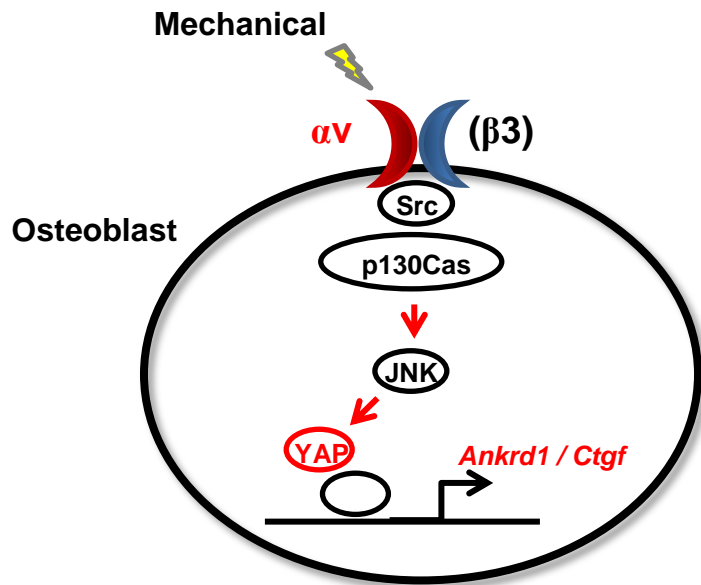

Supplemental Figure 2. Proposed mechanotransduction pathway in osteoblasts lineage cells, and possibly osteocytes. Based on our osteoblastic cell model, we propose that integrin  $\alpha V$  constitutes a mechanosensing machinery in osteoblasts lineage cells, and possibly osteocytes, and transduces a physical force along a signaling pathway involving phosphorylation of p130Cas, JNK and nuclear translocation of YAP/TAZ and transcriptional activation.

Supplemental table 1. Oligonucleotide primers for qPCR

| Gene          | Forward primer (5'-3')   |
|---------------|--------------------------|
|               | Reverse primer (5'-3')   |
| <i>Gapdh</i>  | AGCTTGTCATCAACGGGAAG     |
|               | TTTGATGTTAGTGGGGTCTCG    |
| <i>Itgav</i>  | GGACTGAGATGAAGCAGGAGAGA  |
|               | GGTCTTTGTGCCGTCCTGAA     |
| <i>Egr1</i>   | TCTTGGTGCCTTTTGTGTGAC    |
|               | CTCTTCCTCGTTTTTGCTCTC    |
| <i>Fos</i>    | GTCCGGTTCCTTCTATGCAG     |
|               | TAAGTAGTGCAGCCCGGAGT     |
| <i>Ankrd1</i> | AGTAGAGGAGCTGGTAACAGG    |
|               | TTGGCCGGAAGTGTCTTCAGGT   |
| <i>Ctgf</i>   | AGGAGTGGGTGTGTGACGA      |
|               | CCAGGCAGTTGGCTCGCATC     |
| <i>Yap1</i>   | CAGGAATTATTTTCGGCAGGA    |
|               | CATCCTGCTCCAGTGTAGGC     |
| <i>Sost</i>   | CTTCAGGAATGATGCCACAGAGGT |
|               | ATCTTTGGCGTCATAGGGATGGTG |
